# Supplementary material
Source: publisher figshare collection journal article supplement (https://acs.figshare.com/ndownloader/files/4727974)

Supplemental Information for  
**Reverse Photochromic Behavior of Iron-Magnesium Complex**

Minoru Kobayashi,<sup>†,‡,\*</sup> Akito Takashima,<sup>‡</sup> Tomohiko Ishii,<sup>‡</sup> Hiroshi Naka,<sup>§</sup> Masanobu Uchiyama,<sup>#</sup> and Kentaro Yamaguchi,<sup>†,‡,\*</sup>

*Faculty of Pharmaceutical Sciences at Kagawa Campus, Tokushima Bunri University, 1314-1 Shido, Sanuki, Kagawa 796-2193, Japan, CREST, Japan Science and Technology Agency (JST), Faculty of Engineering, Kagawa University, Takamatsu 761-0396, Japan, Graduate School of Pharmaceutical Sciences, Tohoku University, Aobayama, Aoba-ku, Sendai 980-8578, Japan, and Advanced Elements Chemistry Laboratory, The Institute of Physical and Chemical Research, RIKEN, 2-1 Hirosawa, Wako-shi, Saitama 351-0198, Japan*

**General Comments.** All experiments were carried out under dried nitrogen using standard Schlenk techniques. Methylmagnesium bromide and anhydrous tetrahydrofuran were purchased from Kanto Chemical Co. Ltd., Wako Pure Chemical Industries Ltd., and were used without further purification. Iron(II) chloride was purchased from Wako Pure Chemical Industries Ltd., and was dried under vacuum over 5 h. The UV irradiations were carried out using the light of a 150 W tungsten-xenon source equipped with the cutoff filters to pass the 365 nm wavelength.

**Preparation of (thf)<sub>4</sub>Mg(μ-Br)<sub>2</sub>FeBr<sub>2</sub> (1).** To a heterogeneous solution of iron(II) chloride (2.3 g, 18 mmol) in tetrahydrofuran (100 mL) was added methylmagnesium bromide (89 mmol) at -78 °C, and the mixture was stirred at room temperature for 12 h. The mixture was concentrated and washed three times with hexane (50 mL). The precipitant was collected and recrystallized with tetrahydrofuran to exclude the excess amount of salts. The residual filtrate was concentrated and purified by the recrystallization with dichloromethane (20 mL) to give **1** as the air-sensitive crystals (3.7 g, 30 %). C<sub>16</sub>H<sub>32</sub>O<sub>4</sub>Br<sub>4</sub>FeMg, colorless block, monoclinic, space group *P*2<sub>1</sub>/*c*, *a* = 16.5172(16), *b* = 9.7901(9), *c* = 16.2392(15) Å, β = 114.2880(10)°, *V* = 2393.5(4) Å<sup>3</sup>, *Z* = 4, *D*<sub>calcd</sub> = 1.910 g/cm<sup>3</sup>. Data collected on a Bruker CCD/Smart 1000 diffractometer with graphite-monochromated Mo Kα radiation (λ = 0.71073 Å) at *T* = 100 K, 2θ<sub>max</sub> = 55.0°. The structures were solved by direct methods and refined with full-matrix least-squares procedures, *R*<sub>1</sub> = 0.0446 and *wR*<sub>2</sub> = 0.1289, 13926 reflections measured, 5403 unique (*R*<sub>int</sub> = 0.0395) which were used in all calculations.

**ESR.** JEOL JES-FA100 spectrometer was used for the measurement of X-band ESR spectra, which were referred to the Mn<sup>2+</sup>/MnO marker. Complex **1** was dissolved in THF (3.68 mM), and measured ESR at 77 K. After the measurement, the sample was irradiated at room temperature for 5 minutes. The solution color was changed from yellow to colorless, then measured ESR again at 77 K. Conditions: sweep time, 15 min; center field, 280 mT; sweep width, 250 mT; modulation frequency, 100 kHz; modulation width, 0.6 mT; amplitude, 300; time constant, 0.03 sec; microwave frequency, 9115.340 MHz; microwave power, 0.998 mW.

**UV-Vis Spectroscopy.** UV-Vis spectra were acquired on a JASCO V-560 spectrometer fitted with an ETC-505T Peltier temperature control unit. The measurements were started after the irradiation to the THF solution of **1** (0.48 mM). The kinetics were investigated from the absorption change at 365 nm and fit of the data to second-order kinetics ( $r^2 = 0.9954$ ). Kinetic analysis of the reaction points to a second-order reaction. The rate constants ( $k_{\text{obs}}$ ) was observed to be  $3.38 \times 10^3 \text{ M}^{-1} \text{ s}^{-1}$ .

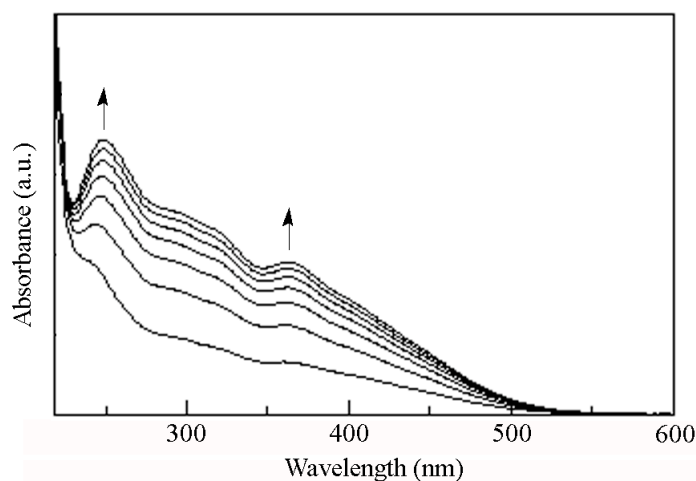

**Figure S1.** Time response of the UV-vis spectra of **1**, measured at intervals of 30 minutes after the dissolution in THF.

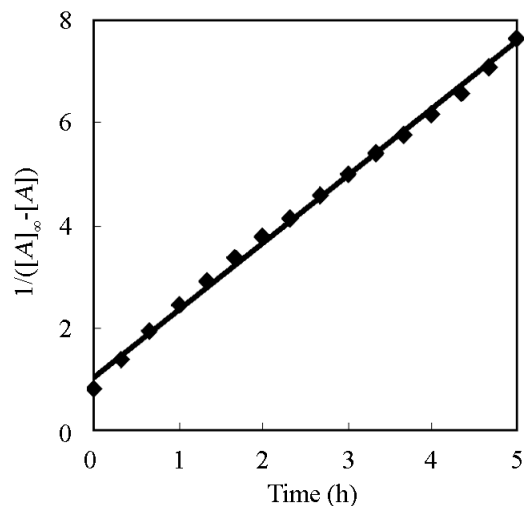

**Figure S2.** Plot of  $1/([A]_{\infty} - [A])$  vs time. The solid line shows the fitting based on a second order reaction ( $r^2 = 0.9954$ ).

**Cyclic voltammetry.** Cyclic voltammetry (CV) was recorded by using a Hokuto Denko HZ-5000 apparatus. Measurements were performed at  $100 \text{ mV s}^{-1}$  in tetrahydrofuran (0.1 mM), using a Pt counter, working electrode, and a Ag/AgCl reference electrode with  $[\text{nBu}_4\text{P}][\text{PF}_6]$  (0.1 M) as an electrolyte. Benchmarked redox couple with ferrocene(II)/(III) was observed at  $E_{1/2} = 188 \text{ mV}$  and  $\Delta E_p = 98 \text{ mV}$ .

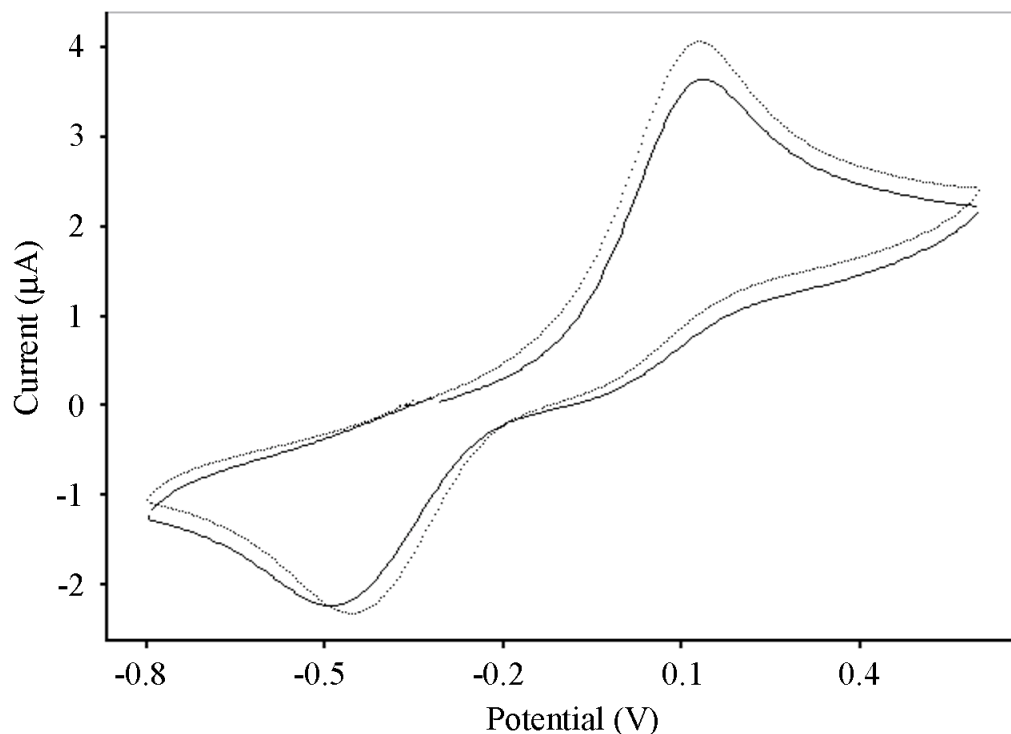

**Figure S3.** Cyclic voltammograms of **1** (0.1 mM) in tetrahydrofuran/ $[\text{nBu}_4\text{P}]\text{PF}_6$  (0.1 M) at  $v = 100 \text{ mV s}^{-1}$  (a) before UV irradiation (solid line), (b) after UV irradiation (dashed line).

**Magnetic measurements (Evans method).** A solution of **1** in THF (4.83 mM) placed in a 5 mm NMR tube, while pure THF- $d^8$  was placed in a capillary tube. Calculations of magnetic moments were based on the difference in the chemical shift observed for the residual THF signal in neat solvent and in the solution containing the paramagnetic species.

$$\chi_g = -3 \Delta f / 4\pi f m + \chi_0 + \chi_0(\delta_0 - \delta_s) / m$$

### Computational Details.

**Gaussian 03.** All calculations were carried out with a Gaussian 03 (G03) program package<sup>1</sup> using the hybrid density functional method based on Becke's three-parameter exchange function and the Lee-Yang-Parr nonlocal correlation functional (B3LYP).<sup>2</sup> We used TZVP<sup>3</sup> basis set for iron<sup>4</sup> and bromine atoms, 6-31+G\* for the other atoms. Geometry optimization, vibrational analysis and time-dependent DFT (TD-DFT)<sup>5</sup> calculation were performed at the same level.

We employed  $(\text{Me}_2\text{O})_4\text{Mg}(\mu\text{-Br})_2\text{MgBr}_2$  (**1a**) as a chemical model for  $(\text{thf})_4\text{Mg}(\mu\text{-Br})_2\text{MgBr}_2$  (**1**). This model was optimized without any symmetry assumptions and characterized by vibrational analysis to confirm its identity as an energy minimum.

The quintet state of **1a** was found to be reasonably lowest in energy compared to other spin states. The low-lying 30 excited states of **1a** were computed using TD-DFT methodology, and no significant oscillator strength ( $f$ ) has been detected here (wavelengths from 3454 nm to 267 nm).

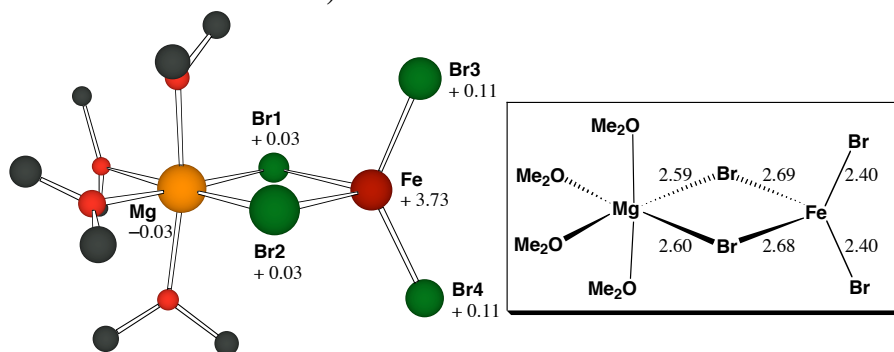

**Figure S4.** An optimized structure of  $(\text{Me}_2\text{O})_4\text{Mg}(\mu\text{-Br})_2\text{MgBr}_2$  (**1a**). Hydrogen atoms are omitted for clarity. Spin densities larger than 0.01 are marked on each atom (left). Calculated bond lengths are shown in angstroms (right).

<sup>1</sup> Frish, M. J. et al. *Gaussian 03*, revision c.01; Gaussian, Inc.; Wallingford, CT, 2004.

<sup>2</sup> (a) Becke, A. D. *Phys. Rev.* **1998**, A38, 3098–3100. (b) Becke, A. D. *J. Chem. Phys.* **1993**, 98, 1372–1377. (c) Becke, A. D. *J. Chem. Phys.* **1993**, 98, 5648–5652. (d) Lee, C.; Yang, W.; Parr, R. G. *Phys. Rev.* **1998**, B37, 785–788.

<sup>3</sup> Godbout, N.; Salahub, D. R.; Andzelm, J.; Wimmer, E. *Can. J. Chem.* **1992**, 70, 560.

<sup>4</sup> A recent example: Irigoras, A; Mercero, J. M.; Silanes, I; Uglade, J. M. *J. Am. Chem. Soc.* **2001**, 123, 5040–5043.

<sup>5</sup> Runge, E.; Gross, E. K. U. *Phys. Rev. Lett.* **1984**, 52, 997–1000.

**Cartesian coordinates of 1a.**

| Center<br>Number | Atomic<br>Number | Atomic<br>Type | Coordinates (Angstroms) |           |           |
|------------------|------------------|----------------|-------------------------|-----------|-----------|
|                  |                  |                | X                       | Y         | Z         |
| 1                | 26               | 0              | 2.113104                | 0.026938  | -0.017371 |
| 2                | 35               | 0              | 0.233454                | 0.025335  | 1.902735  |
| 3                | 35               | 0              | 3.035785                | -2.194901 | -0.045068 |
| 4                | 35               | 0              | 3.148737                | 2.190035  | -0.011241 |
| 5                | 35               | 0              | 0.191726                | 0.021282  | -1.884662 |
| 6                | 12               | 0              | -1.561533               | 0.019961  | 0.029663  |
| 7                | 8                | 0              | -1.827657               | 2.218787  | -0.026247 |
| 8                | 8                | 0              | -1.675344               | -2.224429 | -0.127073 |
| 9                | 8                | 0              | -3.326223               | 0.011115  | -1.385403 |
| 10               | 8                | 0              | -3.107071               | -0.054026 | 1.680016  |
| 11               | 6                | 0              | -1.778832               | -2.830386 | -1.427663 |
| 12               | 6                | 0              | -3.234922               | 0.519018  | -2.729071 |
| 13               | 6                | 0              | -4.610397               | -0.568864 | -1.133686 |
| 14               | 6                | 0              | -0.675914               | 3.097490  | -0.018672 |
| 15               | 6                | 0              | -3.024402               | 2.935875  | -0.334037 |
| 16               | 6                | 0              | -0.892277               | -3.076369 | 0.744991  |
| 17               | 6                | 0              | -3.480546               | -1.297941 | 2.294377  |
| 18               | 6                | 0              | -3.113540               | 1.005257  | 2.657019  |
| 19               | 1                | 0              | -2.308757               | -3.787631 | -1.338672 |
| 20               | 1                | 0              | -2.337848               | -2.151260 | -2.068172 |
| 21               | 1                | 0              | -0.781772               | -2.987068 | -1.850555 |
| 22               | 1                | 0              | -2.240348               | 0.944094  | -2.852050 |
| 23               | 1                | 0              | -3.374436               | -0.298267 | -3.447589 |
| 24               | 1                | 0              | -4.007496               | 1.281832  | -2.887659 |
| 25               | 1                | 0              | -4.630537               | -0.893000 | -0.096067 |
| 26               | 1                | 0              | -5.398890               | 0.176940  | -1.300134 |
| 27               | 1                | 0              | -4.777845               | -1.425263 | -1.799477 |
| 28               | 1                | 0              | 0.193564                | 2.516332  | 0.275679  |
| 29               | 1                | 0              | -0.522677               | 3.510133  | -1.021281 |
| 30               | 1                | 0              | -0.846412               | 3.903042  | 0.705098  |
| 31               | 1                | 0              | -2.965358               | 3.362590  | -1.343642 |
| 32               | 1                | 0              | -3.859174               | 2.237451  | -0.275733 |
| 33               | 1                | 0              | -3.171408               | 3.749140  | 0.388768  |
| 34               | 1                | 0              | -1.370904               | -4.062374 | 0.799363  |
| 35               | 1                | 0              | 0.130363                | -3.164510 | 0.363749  |
| 36               | 1                | 0              | -0.864275               | -2.610062 | 1.726998  |
| 37               | 1                | 0              | -4.487047               | -1.209050 | 2.722785  |
| 38               | 1                | 0              | -3.465684               | -2.065594 | 1.521818  |

|    |   |   |           |           |          |
|----|---|---|-----------|-----------|----------|
| 39 | 1 | 0 | -2.765679 | -1.556460 | 3.084647 |
| 40 | 1 | 0 | -2.784505 | 1.913729  | 2.158451 |
| 41 | 1 | 0 | -4.131100 | 1.128501  | 3.048334 |
| 42 | 1 | 0 | -2.418344 | 0.769510  | 3.469441 |

---

### TD-DFT Calculation of 1a.

TD=(NSTATES=30)

Excitation energies and oscillator strengths:

|                   |          |           |            |          |
|-------------------|----------|-----------|------------|----------|
| Excited State 1:  | ?Spin -A | 0.3589 eV | 3454.69 nm | f=0.0000 |
| Excited State 2:  | ?Spin -A | 0.5283 eV | 2346.66 nm | f=0.0002 |
| Excited State 3:  | ?Spin -A | 0.5917 eV | 2095.39 nm | f=0.0000 |
| Excited State 4:  | ?Spin -A | 0.6433 eV | 1927.19 nm | f=0.0000 |
| Excited State 5:  | ?Spin -A | 3.6761 eV | 337.27 nm  | f=0.0002 |
| Excited State 6:  | ?Spin -A | 3.6822 eV | 336.71 nm  | f=0.0003 |
| Excited State 7:  | ?Spin -A | 3.7229 eV | 333.03 nm  | f=0.0105 |
| Excited State 8:  | ?Spin -A | 3.7641 eV | 329.39 nm  | f=0.0020 |
| Excited State 9:  | ?Spin -A | 3.8397 eV | 322.90 nm  | f=0.0020 |
| Excited State 10: | ?Spin -A | 3.8495 eV | 322.08 nm  | f=0.0016 |
| Excited State 11: | ?Spin -A | 3.8797 eV | 319.57 nm  | f=0.0023 |
| Excited State 12: | ?Spin -A | 3.8859 eV | 319.06 nm  | f=0.0036 |
| Excited State 13: | ?Spin -A | 3.9035 eV | 317.63 nm  | f=0.0001 |
| Excited State 14: | ?Spin -A | 3.9947 eV | 310.37 nm  | f=0.0073 |
| Excited State 15: | ?Spin -A | 4.0603 eV | 305.36 nm  | f=0.0237 |
| Excited State 16: | ?Spin -A | 4.0812 eV | 303.79 nm  | f=0.0001 |
| Excited State 17: | ?Spin -A | 4.1270 eV | 300.42 nm  | f=0.0183 |
| Excited State 18: | ?Spin -A | 4.2101 eV | 294.49 nm  | f=0.0003 |
| Excited State 19: | ?Spin -A | 4.3097 eV | 287.69 nm  | f=0.0001 |
| Excited State 20: | ?Spin -A | 4.3764 eV | 283.30 nm  | f=0.0202 |
| Excited State 21: | ?Spin -A | 4.3777 eV | 283.22 nm  | f=0.0057 |
| Excited State 22: | ?Spin -A | 4.4100 eV | 281.14 nm  | f=0.0001 |
| Excited State 23: | ?Spin -A | 4.4438 eV | 279.00 nm  | f=0.0004 |
| Excited State 24: | ?Spin -A | 4.4563 eV | 278.22 nm  | f=0.0033 |
| Excited State 25: | ?Spin -A | 4.4750 eV | 277.06 nm  | f=0.0013 |
| Excited State 26: | ?Spin -A | 4.5289 eV | 273.76 nm  | f=0.0016 |
| Excited State 27: | ?Spin -A | 4.5455 eV | 272.76 nm  | f=0.0022 |
| Excited State 28: | ?Spin -A | 4.5789 eV | 270.77 nm  | f=0.0003 |
| Excited State 29: | ?Spin -A | 4.5945 eV | 269.85 nm  | f=0.0016 |
| Excited State 30: | ?Spin -A | 4.6397 eV | 267.23 nm  | f=0.0002 |

**DV-X $\alpha$ .** In order to compare the electronic structures between monomer and dimer structures, a new expected cluster model based on the dimer structure should be required. The cluster model (FeBr<sub>4</sub>(thf)) discussed in this study has been built semiempirically, as following:

1. The structurally-similar molecule of the expected dimer structure, tetramagnesium molecule was prepared as a based cluster model.<sup>1</sup>
2. Substitute iron and bromine atoms for corresponding magnesium and chlorine atom positions, respectively.
3. Revise the bond lengths among the iron, magnesium and bromine atoms according to the statistical factor (M-Br / M-Cl = 1.06), and extend the cluster size similarly. The statistical factor can be found by the software "MOGUL" ([http://www.ccdc.cam.ac.uk/products/csd\\_system/mogul/](http://www.ccdc.cam.ac.uk/products/csd_system/mogul/)).

The cluster model extracted a part of the FeBr<sub>4</sub>(thf) from the revised structure was employed for the molecular orbital calculation, because the cluster model is large enough to discuss the energy level structures of the 3d-electron orbitals of the iron atoms. The non-relativistic DV-X $\alpha$  calculations of **1** and the cluster model were performed with the Slater exchange parameter,  $\alpha$ , of 0.7 for all atoms and with 29000 and 9000 DV sampling points, respectively, which provided a precision of less than 0.1 eV for valence electron energy eigenvalues. We employed the basis functions of the iron and bromine atoms up to 4p orbitals. The calculations were carried out self-consistently until the difference in orbital populations between the initial and final states of the iteration was less than 0.01 electron/orbital. The computational details of the non-relativistic (DV-HFS) method used in the present work have been described elsewhere.<sup>2</sup>

#### Reference

1. C<sub>28</sub>H<sub>58</sub>Cl<sub>6</sub>Mg<sub>4</sub>O<sub>6</sub>; Diethyl-hexachloro-hexa(tetrahydrofuran)-tetramagnesium, J. Toney and G. D. Stucky, *J. Organomet. Chem.*, **1971**, 28, 5.
2. H. Adachi, M. Tsukada, and C. Satoko, *J. Phys. Soc. Jpn.*, **1978**, 45, 875.

| atom | #  | x (Å)     | y (Å)     | z (Å)     |
|------|----|-----------|-----------|-----------|
| Fe   | 1  | 0         | 0         | 0         |
| Br   | 2  | -0.148026 | 2.439957  | 0.696503  |
| Br   | 3  | -0.469849 | -1.369858 | 2.09874   |
| Br   | 4  | -2.948349 | 0.193268  | -0.099823 |
| Br   | 5  | 0.23201   | -0.848877 | -2.150253 |
| O    | 6  | 2.088669  | 0.001648  | 0.446442  |
| C    | 7  | 2.971802  | 0.329819  | -0.470856 |
| C    | 8  | 4.005737  | 1.031311  | 0.263184  |
| C    | 9  | 4.210007  | -0.160797 | 1.049057  |
| C    | 10 | 2.918015  | -0.577911 | 1.40831   |
| H    | 11 | 2.503983  | 1.023376  | -1.204926 |
| H    | 12 | 3.399658  | -0.593704 | -0.921143 |
| H    | 13 | 3.539764  | 1.817642  | 0.898239  |
| H    | 14 | 4.885208  | 1.192612  | -0.399567 |
| H    | 15 | 4.784637  | 0.095383  | 1.967148  |
| H    | 16 | 4.688858  | -0.942413 | 0.417786  |
| H    | 17 | 2.853363  | -1.686569 | 1.334488  |
| H    | 18 | 2.663376  | -0.170013 | 2.412064  |

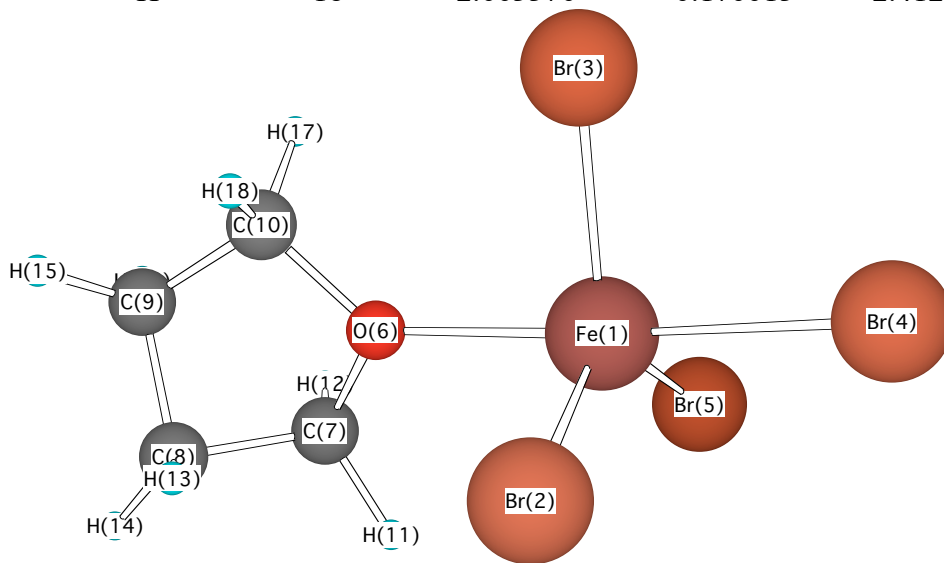

Supplement: Supplementary file 1 [file 4727974]
